# Supplementary material for: The activity key of s-block single-atom catalysts for superior CO2RR: sp2 hybridization of metal sites
Source: Royal Society of Chemistry journal article supplement (doi:10.1039/d4ta08838g), 2025-01-01
Supplement: d4ta08838g1.pdf [file d4ta08838g1.pdf]

## Supplementary Information

### The activity key of s-Block Single-Atom Catalysts for Superior CO<sub>2</sub>RR: sp<sup>2</sup> Hybridization of metal sites

Ce Liu<sup>a</sup>, Shoufu Cao<sup>b</sup>, Yuteng Wei<sup>a</sup>, Zengxuan Chen<sup>a</sup>, Siyuan Liu<sup>a</sup>, Hongyu Chen<sup>a</sup>,  
Yitong Yin<sup>a</sup>, Shaolong Yue<sup>a</sup>, Shuxian Wei<sup>c</sup>, Zhaojie Wang<sup>a\*</sup>, Xiaoqing Lu<sup>a</sup>

<sup>a</sup> *School of Materials Science and Engineering, China University of Petroleum, Qingdao, Shandong 266580, P. R. China*

<sup>b</sup> *Department of Chemistry and Guangdong Provincial Key Laboratory of Catalysis, Southern University of Science and Technology, Shenzhen 518055 Guangdong, China*

<sup>c</sup> *College of Science, China University of Petroleum, Qingdao, Shandong 266580, P. R. China*

\* Corresponding authors: Zhaojie Wang

E-mail address: wangzhaojie@upc.edu.cn

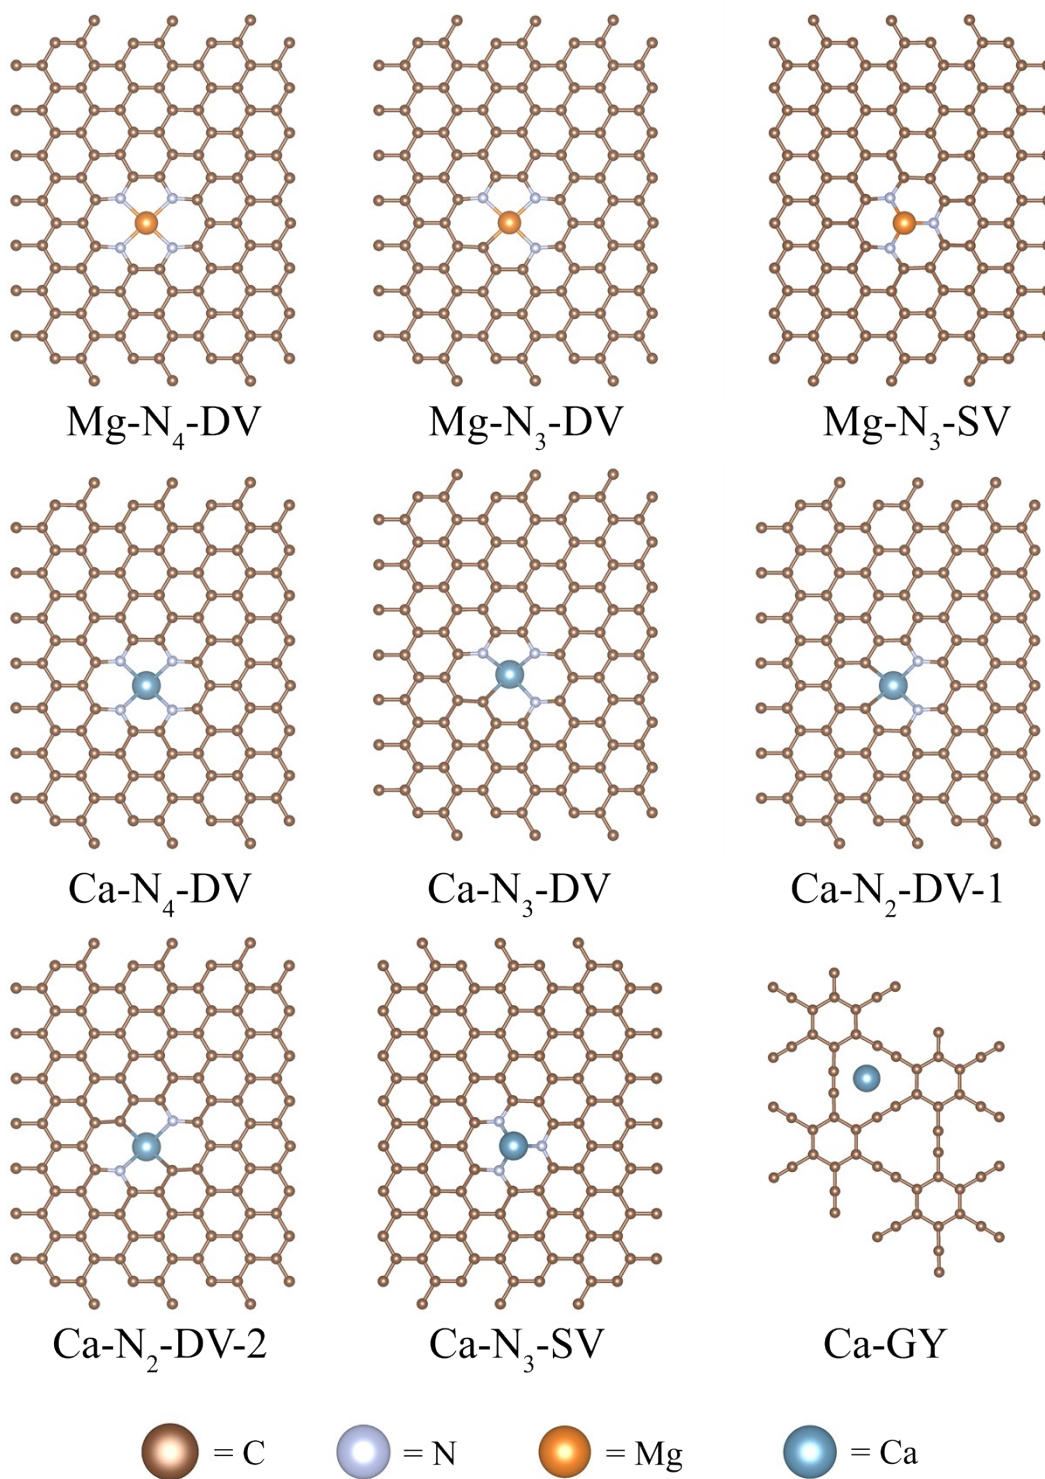

**Figure S1** Structural diagrams of all stabilized structures

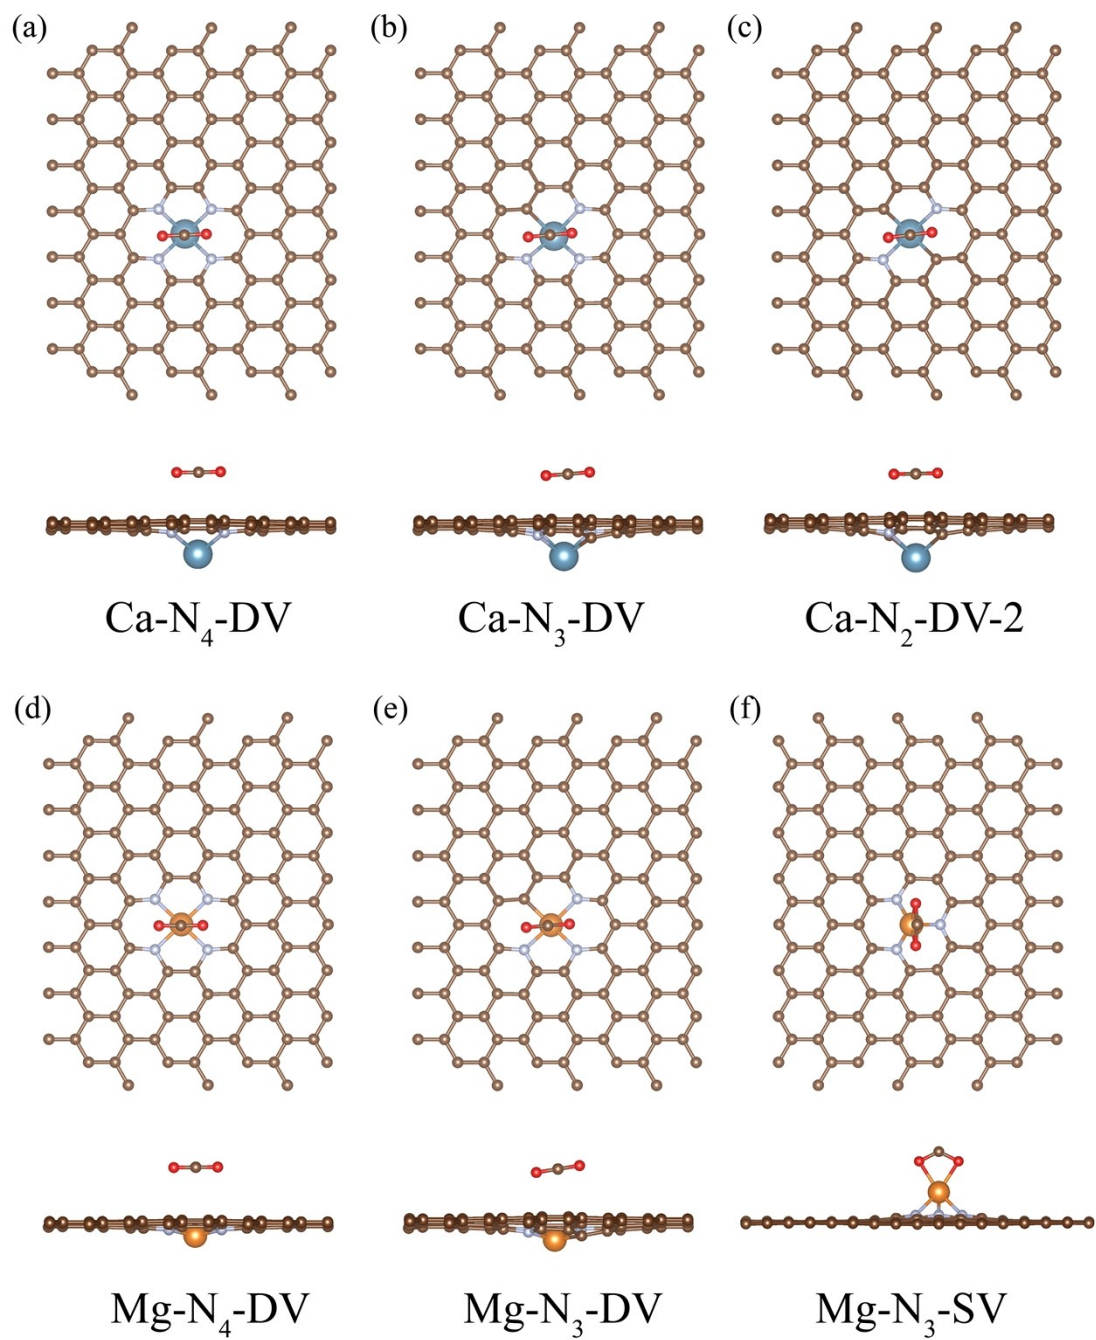

**Figure S2** Top and side views of  $\text{CO}_2$  adsorbed on (a)  $\text{Ca-N}_4\text{-DV}$ , (b)  $\text{Ca-N}_3\text{-DV}$ , (c)  $\text{Ca-N}_2\text{-DV-2}$ , (d)  $\text{Mg-N}_4\text{-DV}$ , (e)  $\text{Mg-N}_3\text{-DV}$  and (f)  $\text{Mg-N}_3\text{-SV}$

## In-depth discussion on adsorption mechanisms

By analyzing geometric data, Bader charge distribution, charge density difference maps, and partial density of states (pDOS), we found that CO<sub>2</sub> adsorption on Ca-N<sub>2</sub>-DV-1 is primarily physisorption, whereas on Ca-N<sub>3</sub>-SV and Ca-GY, it exhibits chemisorption characteristics. While chemisorption is typically associated with a more negative adsorption energy, promoting catalytic reactions, our study reveals an intriguing observation. In our work, the chemisorption of CO<sub>2</sub> on our s-block signal-atom catalysts exhibits a substantial free energy barrier (~2 eV), which significantly impedes the CO<sub>2</sub> reduction reaction (CO<sub>2</sub>RR). To understand the origins of this phenomenon, we conducted an in-depth investigation.

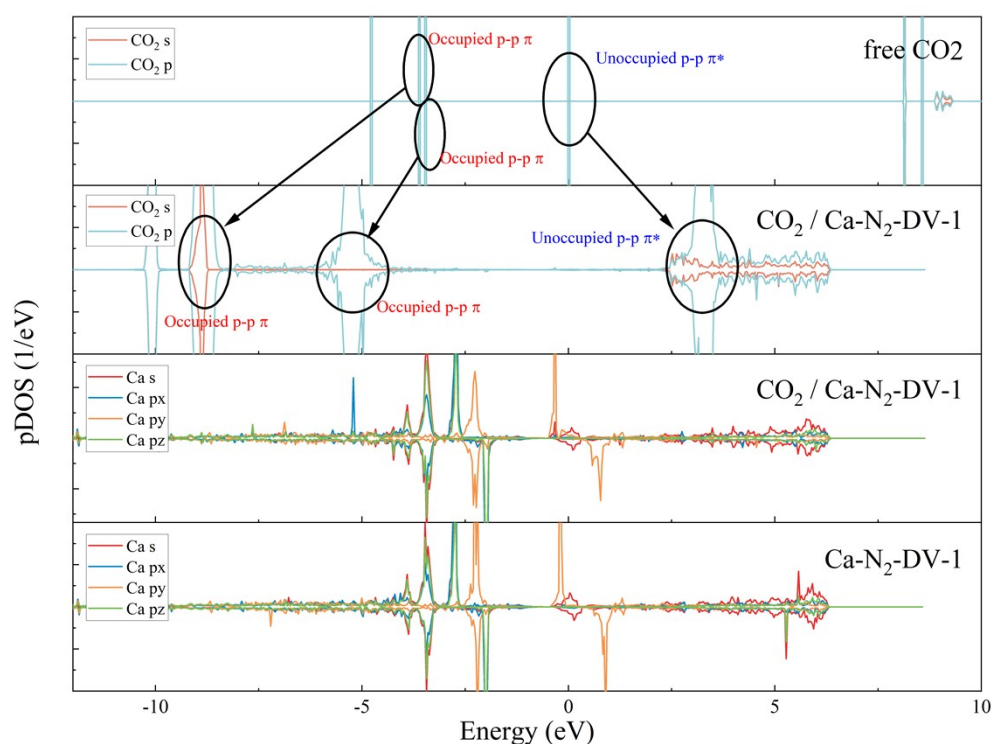

**Figure S3** pDOS of free bent CO<sub>2</sub>, CO<sub>2</sub> adsorbed on Ca-N<sub>2</sub>-DV-1 and Ca-N<sub>2</sub>-DV-1.

Figure S3 illustrates the detailed process of CO<sub>2</sub> physisorption on Ca-N<sub>2</sub>-DV-1. Notably, following physisorption, the energy levels of the orbitals undergo changes, becoming more delocalized. However, despite these alterations, the filling of the

orbitals remains unchanged, and no additional bonding was observed.

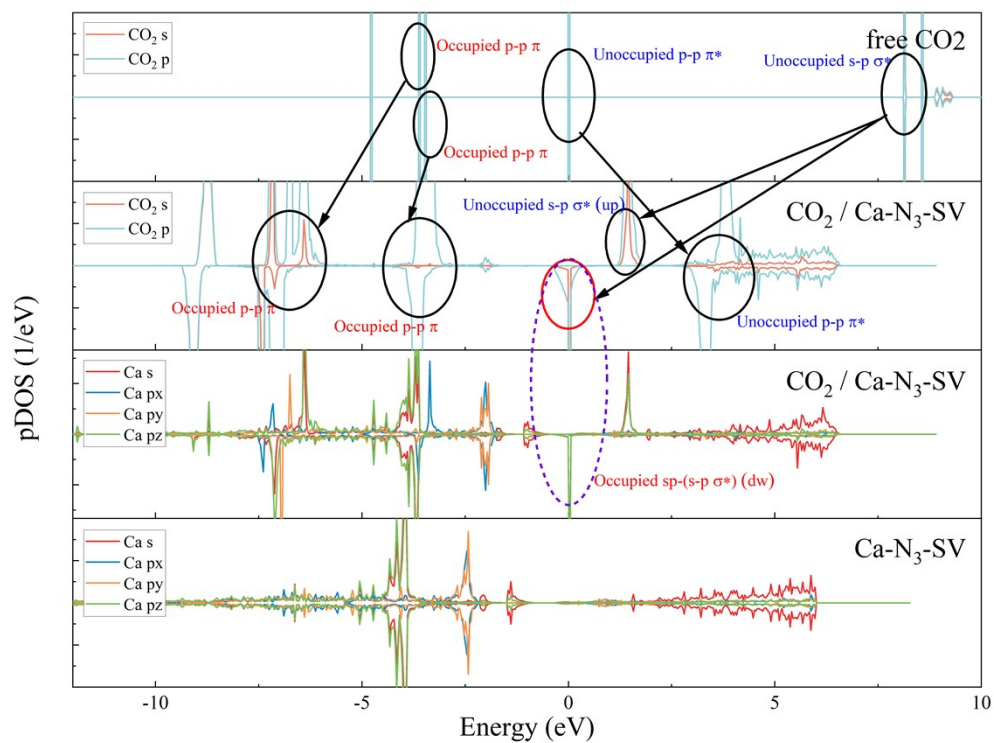

**Figure S4** pDOS of free bent CO<sub>2</sub>, CO<sub>2</sub> adsorbed on Ca-N<sub>3</sub>-SV and Ca-N<sub>3</sub>-SV.

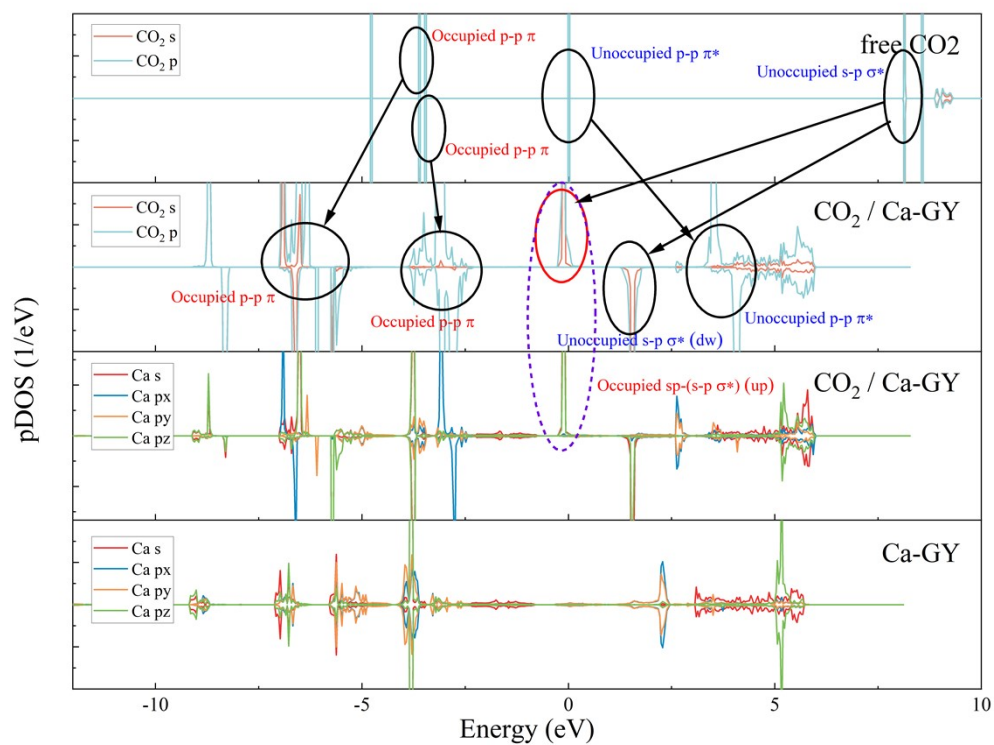

**Figure S5** pDOS of free bent CO<sub>2</sub>, CO<sub>2</sub> adsorbed on Ca-GY and Ca-GY.

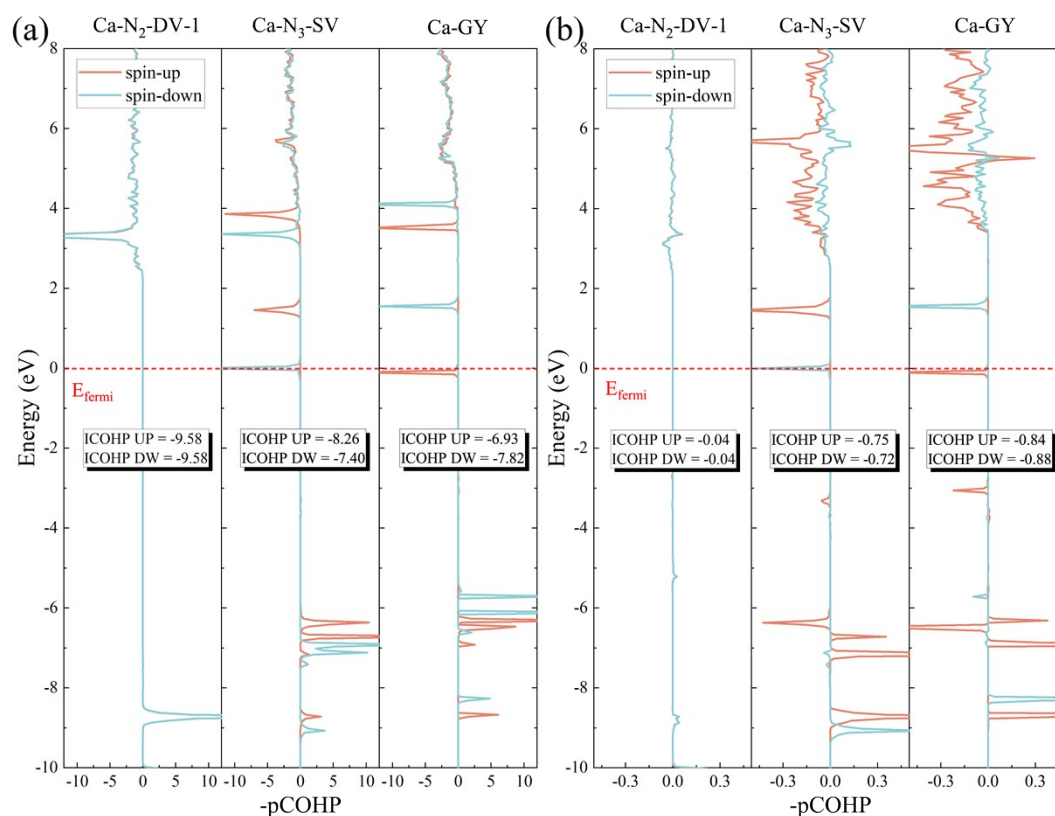

**Figure S6** The projected Crystal Orbital Hamilton Populations (pCOHP) and integrated pCOHP (ICOHP) values of (a) C-O bonds and (b) Ca-O bonds on Ca-N<sub>2</sub>-DV-1, Ca-N<sub>3</sub>-SV, and Ca-GY.

Figure S4 provides a detailed depiction of the CO<sub>2</sub> chemisorption process on Ca-N<sub>3</sub>-SV. Notably, the s-p  $\sigma$  orbital, formed by the C 2p and O 2p orbitals, weakly interacts with the Ca sp hybridized orbital. As a result, occupied sp- $\sigma$  bonding orbitals form, exhibiting weak bonding characteristics (Figure S6b<sup>1,2</sup>). Additionally, the degenerate p-p  $\pi$  orbitals, formed by the C 2p and O 2p orbitals, interact with the Ca sp hybridized orbital. Specifically, they give rise to occupied sp- $\pi$  bonding orbitals and (sp- $\pi$ )\* antibonding orbitals. These orbitals contribute to bonding and antibonding interactions (Figure S6b), with offsetting effects on the overall energy. Additionally, the  $\sigma$  antibonding orbital formed by C 2s and O 2p bond to Ca sp hybridized orbital with matching symmetry. This interaction results in the formation of unoccupied sp- $\sigma$ \* antibonding orbitals (spin-up) and occupied sp- $\sigma$ \* antibonding orbitals (spin-down). Notably, the substantial energy level difference between the C 2s and O 2p orbitals

leads to the creation of a  $\sigma$  antibonding orbital with pronounced antibonding properties. Consequently, the presence of occupied  $sp-\sigma^*$  antibonding orbitals (spin-down) significantly increases the system energy (Figure S6a, b).

Figure S5 illustrates the detailed process of  $\text{CO}_2$  chemisorption on Ca-GY. Notably, this process closely resembles that observed for Ca-N<sub>3</sub>-SV.

In summary,  $\text{CO}_2$  does not form bonds with Ca-N<sub>2</sub>-DV-1 due to the absence of matching symmetry, resulting in smaller free energy changes before and after adsorption. However, certain bonding and antibonding molecular orbitals of  $\text{CO}_2$  interact with Ca  $sp$  hybridized orbitals with matching symmetry, resulting in bonding and antibonding interactions. While the partial bonding state reduces the total energy, the occupation of the strong antibonding orbital  $\sigma^*$  significantly elevates the overall energy, leading to a substantial  $\text{CO}_2$  chemisorption barrier.

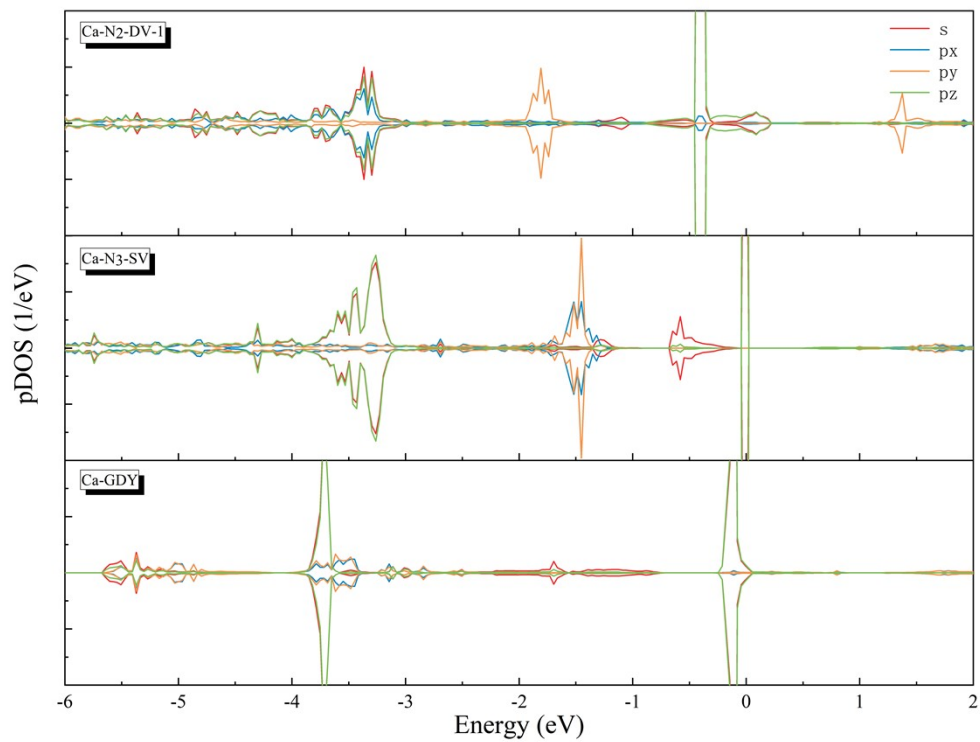

**Figure S7** pDOS of H adsorbed on Ca-N<sub>2</sub>-DV-1, Ca-N<sub>3</sub>-SV and Ca-GY.



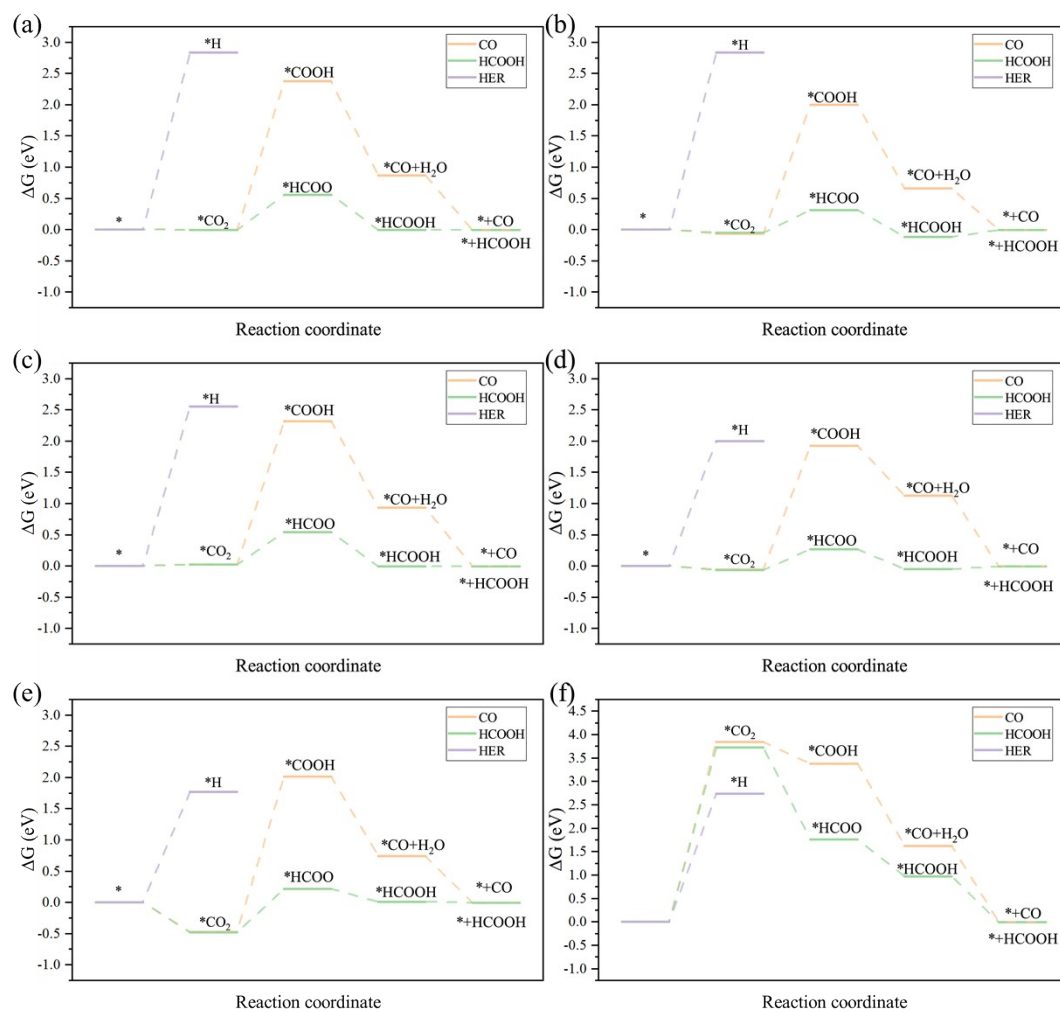

**Figure S8** The constant Potential free energy diagrams for CO<sub>2</sub>RR and HER on (a) Ca-N<sub>4</sub>-DV, (b) Ca-N<sub>2</sub>-DV-2, (c) Ca-N<sub>3</sub>-DV, (d) Mg-N<sub>4</sub>-DV, (e) Mg-N<sub>3</sub>-DV and (f) Mg-N<sub>3</sub>-SV at equilibrium potentials.

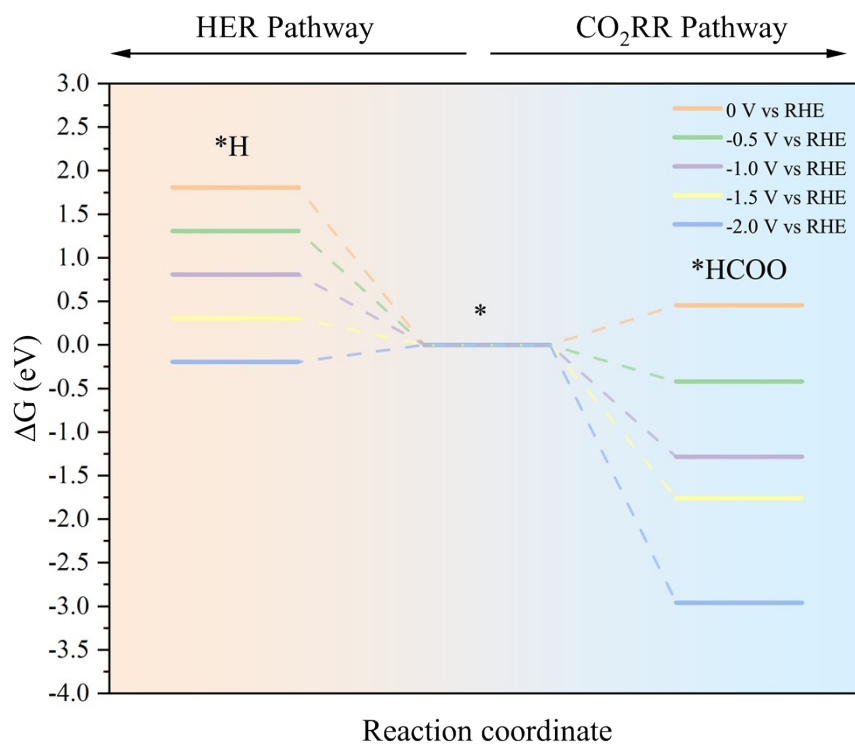

**Figure S9** The constant Potential free energy diagrams for the first hydrogenation step with applied potential on Ca-N<sub>2</sub>-DV-1.

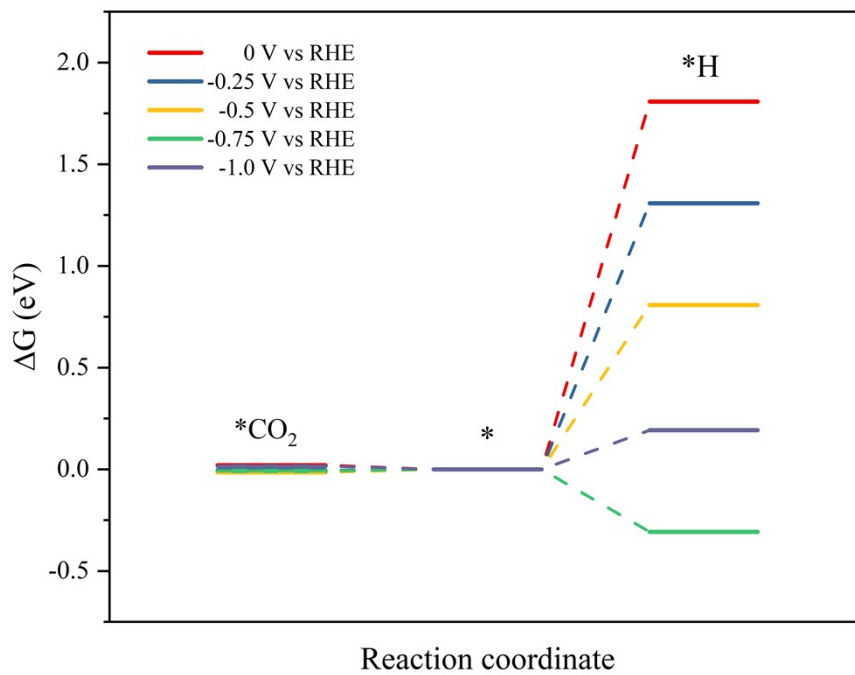

**Figure S10** The constant Potential free energy diagrams of  $CO_2$  and H adsorption under varying applied potentials (0 V, -0.25 V, -0.5 V, -0.75 V, -1.0 V vs RHE).

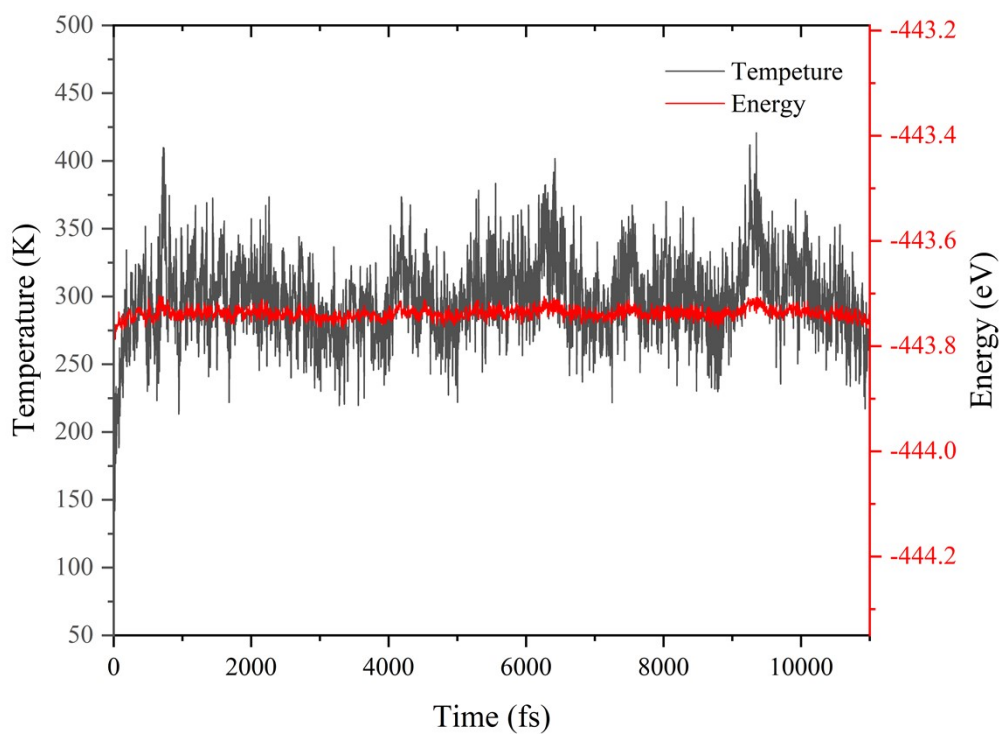

**Figure S11.** Energy and temperature profiles of the Ca-N<sub>2</sub>-DV-1 structure during AIMD simulations at 300 K. The simulation consists of a 1 ps temperature control phase followed by a 10 ps equilibrium phase.

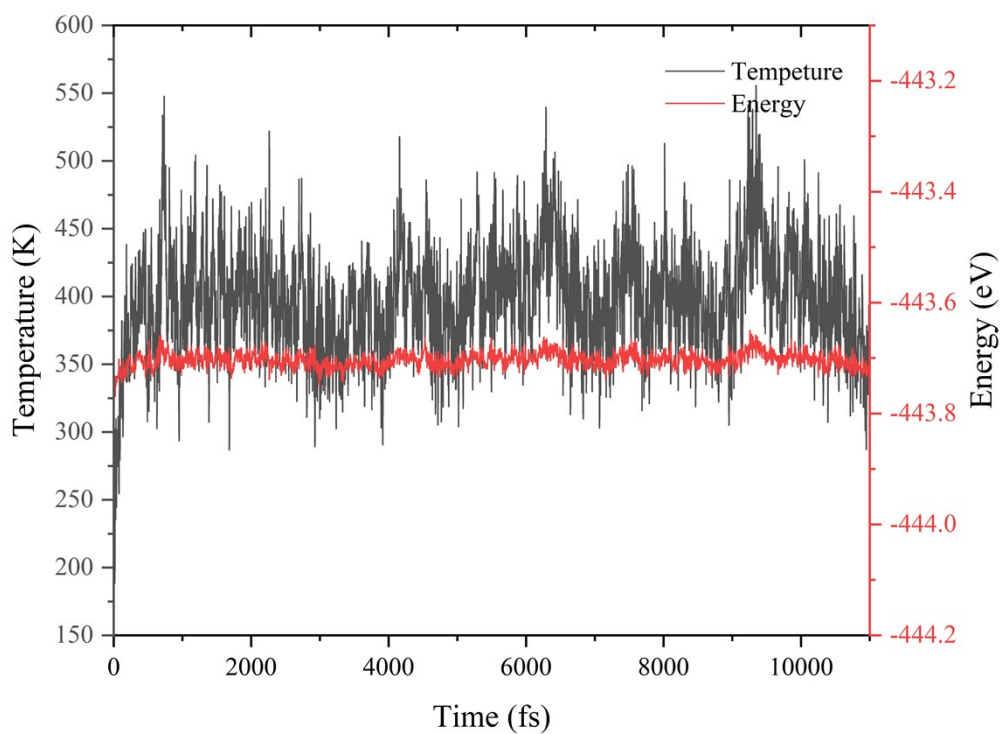

**Figure S12.** Energy and temperature profiles of the Ca-N<sub>2</sub>-DV-1 structure during AIMD simulations at 400 K. The simulation consists of a 1 ps temperature control phase followed by a 10 ps equilibrium phase.

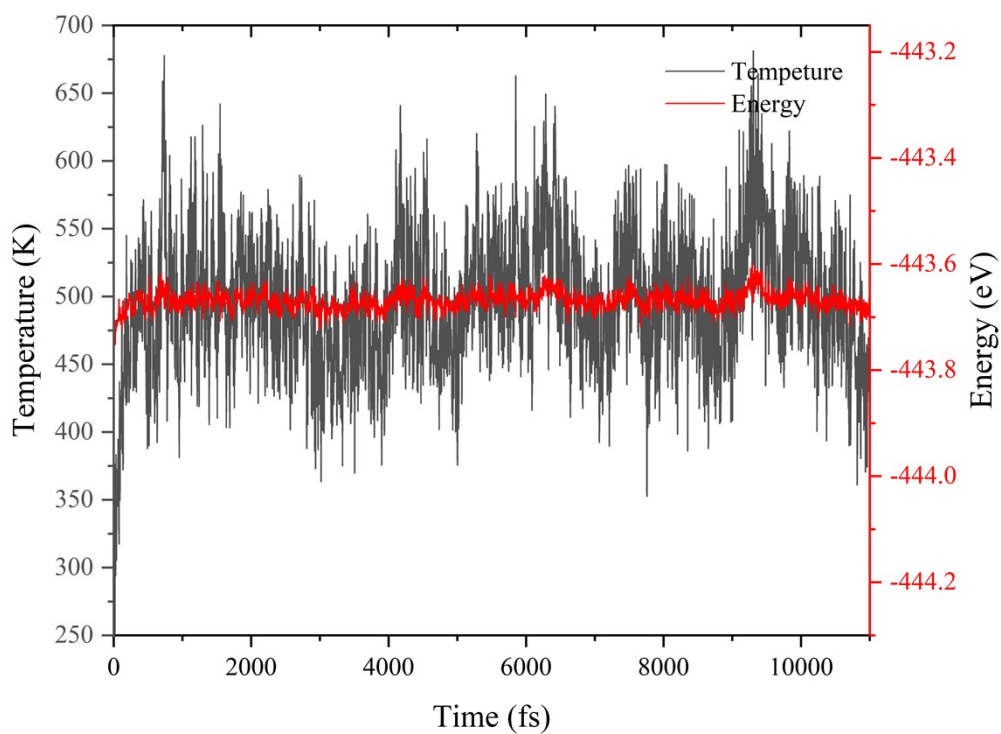

**Figure S13.** Energy and temperature profiles of the Ca-N<sub>2</sub>-DV-1 structure during AIMD simulations at 500 K. The simulation consists of a 1 ps temperature control phase followed by a 10 ps equilibrium phase.

**Table S1.** Computed gas phase properties.

| Gas molecule     | Fugacity (Pa) <sup>3</sup> | ZPE (eV) | $\int C_p dT$ (eV) | -TS (eV) |
|------------------|----------------------------|----------|--------------------|----------|
| CO               | 101325                     | 0.13     | 0.09               | -0.61    |
| CO <sub>2</sub>  | 101325                     | 0.31     | 0.10               | -0.66    |
| HCOOH            | 3534                       | 0.88     | 0.11               | -0.86    |
| H <sub>2</sub> O | 19                         | 0.57     | 0.10               | -0.27    |

**Table S2.** Thermodynamic energy corrections for selected adsorbates.

| Adsorbate        | ZPE (eV) | $\int C_p dT$ (eV) | -TS (eV) |
|------------------|----------|--------------------|----------|
| *CO <sub>2</sub> | 0.31     | 0.05               | -0.10    |
| *COOH            | 0.56     | 0.05               | -0.11    |
| *HCOO            | 0.59     | 0.07               | -0.14    |
| *CO              | 0.16     | 0.03               | -0.05    |
| *HCOOH           | 0.93     | 0.13               | -0.28    |

**Table S3** Calculated equilibrium potentials for electrochemical CO<sub>2</sub> reduction for CO and HCOOH

| Reaction                                                                             | Equilibrium potential<br>(V vs RHE, pH = 6.8) |
|--------------------------------------------------------------------------------------|-----------------------------------------------|
| $\text{CO}_2 + 2\text{H}^+ + 2\text{e}^- \rightarrow \text{CO} + \text{H}_2\text{O}$ | -0.12                                         |
| $\text{CO}_2 + 2\text{H}^+ + 2\text{e}^- \rightarrow \text{HCOOH}$                   | -0.20                                         |





**Table S4.** Calculated Bader charge populations of the active sites (M) and CO<sub>2</sub>. Geometric parameter of adsorbed CO<sub>2</sub>.

| <b>Structure</b>        | <b>M (slab)<br/>(e)</b> | <b>M (*CO<sub>2</sub>)<br/>(e)</b> | <b>CO<sub>2</sub><br/>(*CO<sub>2</sub>) (e)</b> | <b>L<sub>C-O1</sub><br/>(Å)</b> | <b>L<sub>C-O2</sub><br/>(Å)</b> | <b>Bond angle<br/>(degree)</b> |
|-------------------------|-------------------------|------------------------------------|-------------------------------------------------|---------------------------------|---------------------------------|--------------------------------|
| Mg-N <sub>4</sub> -DV   | 8.24                    | 8.25                               | 16.01                                           | 1.177                           | 1.177                           | 179.63                         |
| Mg-N <sub>3</sub> -DV   | 8.27                    | 8.26                               | 16.01                                           | 1.176                           | 1.178                           | 179.83                         |
| Mg-N <sub>3</sub> -SV   | 8.17                    | 8.26                               | 16.92                                           | 1.260                           | 1.260                           | 127.11                         |
| Ca-N <sub>4</sub> -DV   | 8.37                    | 8.36                               | 16.01                                           | 1.176                           | 1.176                           | 179.14                         |
| Ca-N <sub>3</sub> -DV   | 8.38                    | 8.38                               | 16.01                                           | 1.176                           | 1.177                           | 178.86                         |
| Ca-N <sub>2</sub> -DV-1 | 8.37                    | 8.36                               | 16.02                                           | 1.176                           | 1.177                           | 178.74                         |
| Ca-N <sub>2</sub> -DV-2 | 8.42                    | 8.41                               | 16.01                                           | 1.176                           | 1.177                           | 178.87                         |
| Ca-N <sub>3</sub> -SV   | 8.31                    | 8.34                               | 16.81                                           | 1.241                           | 1.242                           | 135.78                         |
| Ca-GY                   | 8.26                    | 8.30                               | 16.86                                           | 1.262                           | 1.263                           | 128.31                         |

**Table S5.** Calculated Bader charge populations of the active sites (M) and adsorbates (\*COOH/\*HCOO).

| <b>Structure</b>        | <b>M (*COOH)<br/>(e)</b> | <b>COOH(*COOH)<br/>(e)</b> | <b>M (*HCOO)<br/>(e)</b> | <b>HCOO(*HCOO)<br/>(e)</b> |
|-------------------------|--------------------------|----------------------------|--------------------------|----------------------------|
| Mg-N <sub>4</sub> -DV   | 8.34                     | 17.81                      | 8.27                     | 17.90                      |
| Mg-N <sub>3</sub> -DV   | 8.36                     | 17.78                      | 8.31                     | 17.90                      |
| Mg-N <sub>3</sub> -SV   | 8.22                     | 17.91                      | 8.24                     | 17.91                      |
| Ca-N <sub>4</sub> -DV   | 8.42                     | 17.84                      | 8.40                     | 17.88                      |
| Ca-N <sub>3</sub> -DV   | 8.41                     | 17.82                      | 8.39                     | 17.87                      |
| Ca-N <sub>2</sub> -DV-1 | 8.36                     | 17.82                      | 8.35                     | 17.87                      |
| Ca-N <sub>2</sub> -DV-2 | 8.43                     | 17.71                      | 8.41                     | 17.87                      |
| Ca-N <sub>3</sub> -SV   | 8.35                     | 17.84                      | 8.34                     | 17.88                      |
| Ca-GY                   | 8.33                     | 17.80                      | 8.31                     | 17.84                      |

**Table S6.** Calculated Bader charge populations of the active sites (M) and adsorbates (\*CO/\*HCOOH).

| <b>Structure</b>        | <b>M (*CO)<br/>(e)</b> | <b>CO(*CO)<br/>(e)</b> | <b>M (*HCOOH)<br/>(e)</b> | <b>HCOOH(*HCOOH)<br/>(e)</b> |
|-------------------------|------------------------|------------------------|---------------------------|------------------------------|
| Mg-N <sub>4</sub> -DV   | 8.30                   | 9.99                   | 8.30                      | 17.96                        |
| Mg-N <sub>3</sub> -DV   | 8.32                   | 10.08                  | 8.31                      | 17.98                        |
| Mg-N <sub>3</sub> -SV   | 8.19                   | 10.01                  | 8.23                      | 17.95                        |
| Ca-N <sub>4</sub> -DV   | 8.38                   | 9.97                   | 8.40                      | 17.96                        |
| Ca-N <sub>3</sub> -DV   | 8.41                   | 9.98                   | 8.42                      | 17.96                        |
| Ca-N <sub>2</sub> -DV-1 | 8.40                   | 9.98                   | 8.40                      | 17.97                        |
| Ca-N <sub>2</sub> -DV-2 | 8.41                   | 10.05                  | 8.44                      | 18.01                        |
| Ca-N <sub>3</sub> -SV   | 8.34                   | 9.97                   | 8.36                      | 17.95                        |
| Ca-GY                   | 8.28                   | 9.96                   | 8.30                      | 17.93                        |

**Table S7.** Key structural and electronic properties of the studied SACs: Bader charges population of metal sites and the M-CA bond lengths (M refers to the metal sites Mg or Ca, CA refers to the coordinating atoms C or N).

| <b>Structure</b>        | <b>Bader charge (e)</b> | <b>M-CA bond length (Å)</b>        |
|-------------------------|-------------------------|------------------------------------|
| Mg-N <sub>4</sub> -DV   | 8.24                    | 1.96; 1.96; 1.96; 1.96             |
| Mg-N <sub>3</sub> -DV   | 8.27                    | 1.98; 1.95; 1.98; 1.97             |
| Mg-N <sub>3</sub> -SV   | 8.17                    | 1.94; 1.94; 1.94                   |
| Ca-N <sub>4</sub> -DV   | 8.37                    | 2.27; 2.27; 2.27; 2.27             |
| Ca-N <sub>3</sub> -DV   | 8.38                    | 2.32; 2.29; 2.29; 2.34             |
| Ca-N <sub>2</sub> -DV-1 | 8.37                    | 2.38; 2.28; 2.28; 2.38             |
| Ca-N <sub>2</sub> -DV-2 | 8.42                    | 2.31; 2.39; 2.30; 2.40             |
| Ca-N <sub>3</sub> -SV   | 8.31                    | 2.19; 2.18; 2.19                   |
| Ca-GY                   | 8.26                    | 2.48; 2.54; 2.65; 2.65; 2.48; 2.54 |

**Table S8.** Net Charge,  $E_{\text{DFT}}$ ,  $E_{\text{f}}$ , fermishift, corresponding U and potential-dependent electrochemical energy for Ca-N<sub>4</sub>-DV with different adsorptions.

| Adsorption      | Net Charge<br>(e) | $E_{\text{DFT}}$<br>(eV) | $E_{\text{f}}$<br>(eV) | $E_{\text{fermishift}}$<br>(eV) | U<br>(V vs SHE) | E<br>(eV) |
|-----------------|-------------------|--------------------------|------------------------|---------------------------------|-----------------|-----------|
| None            | 1                 | -651.856                 | -2.885                 | 0.173                           | -1.728          | -648.971  |
|                 | 0.5               | -650.314                 | -3.244                 | 0.173                           | -1.369          | -648.691  |
|                 | 0                 | -648.553                 | -3.741                 | 0.173                           | -0.873          | -648.553  |
|                 | -0.5              | -646.604                 | -4.058                 | 0.173                           | -0.555          | -648.632  |
|                 | -1                | -644.512                 | -4.306                 | 0.173                           | -0.307          | -648.818  |
| CO <sub>2</sub> | 1                 | -675.108                 | -2.861                 | 0.177                           | -1.756          | -672.247  |
|                 | 0.5               | -673.577                 | -3.225                 | 0.177                           | -1.392          | -671.965  |
|                 | 0                 | -671.825                 | -3.721                 | 0.177                           | -0.896          | -671.825  |
|                 | -0.5              | -669.884                 | -4.045                 | 0.177                           | -0.572          | -671.907  |
|                 | -1                | -667.797                 | -4.301                 | 0.177                           | -0.316          | -672.098  |
| *COOH           | 1                 | -677.400                 | -3.570                 | 0.177                           | -1.047          | -673.829  |
|                 | 0.5               | -675.533                 | -3.886                 | 0.177                           | -0.731          | -673.59   |
|                 | 0                 | -673.519                 | -4.155                 | 0.177                           | -0.462          | -673.519  |
|                 | -0.5              | -671.375                 | -4.453                 | 0.177                           | -0.164          | -673.601  |
|                 | -1                | -669.057                 | -4.763                 | 0.177                           | 0.146           | -673.819  |
| *HCOO           | 1                 | -679.162                 | -3.5924                | 0.177                           | -1.025          | -675.569  |
|                 | 0.5               | -677.284                 | -3.9098                | 0.177                           | -0.707          | -675.329  |
|                 | 0                 | -675.258                 | -4.178                 | 0.177                           | -0.439          | -675.258  |
|                 | -0.5              | -673.103                 | -4.470                 | 0.177                           | -0.147          | -675.338  |
|                 | -1                | -670.780                 | -4.7763                | 0.177                           | 0.159           | -675.556  |
| *CO             | 1                 | -666.498                 | -2.887                 | 0.176                           | -1.729          | -663.612  |
|                 | 0.5               | -664.955                 | -3.249                 | 0.176                           | -1.367          | -663.331  |
|                 | 0                 | -663.193                 | -3.740                 | 0.176                           | -0.876          | -663.193  |
|                 | -0.5              | -661.244                 | -4.055                 | 0.176                           | -0.561          | -663.272  |
|                 | -1                | -659.153                 | -4.304                 | 0.176                           | -0.312          | -663.458  |
| *HCOOH          | 1                 | -682.077                 | -2.880                 | 0.177                           | -1.737          | -679.197  |
|                 | 0.5               | -680.537                 | -3.246                 | 0.177                           | -1.371          | -678.914  |
|                 | 0                 | -678.775                 | -3.736                 | 0.177                           | -0.881          | -678.775  |
|                 | -0.5              | -676.828                 | -4.054                 | 0.177                           | -0.563          | -678.855  |
|                 | -1                | -674.736                 | -4.307                 | 0.177                           | -0.310          | -679.043  |

**Table S9.** Net Charge,  $E_{\text{DFT}}$ ,  $E_{\text{f}}$ , fermishift, corresponding U and potential-dependent electrochemical energy for Ca-N<sub>3</sub>-DV with different adsorptions.

| Adsorption      | Net Charge<br>(e) | $E_{\text{DFT}}$<br>(eV) | $E_{\text{f}}$<br>(eV) | $E_{\text{fermishift}}$<br>(eV) | U<br>(V vs SHE) | E<br>(eV) |
|-----------------|-------------------|--------------------------|------------------------|---------------------------------|-----------------|-----------|
| None            | 1                 | -650.700                 | -3.168                 | 0.174                           | -1.446          | -647.532  |
|                 | 0.5               | -649.040                 | -3.473                 | 0.174                           | -1.141          | -647.303  |
|                 | 0                 | -647.229                 | -3.757                 | 0.174                           | -0.857          | -647.229  |
|                 | -0.5              | -645.277                 | -4.042                 | 0.174                           | -0.572          | -647.298  |
|                 | -1                | -643.170                 | -4.369                 | 0.174                           | -0.246          | -647.538  |
| CO <sub>2</sub> | 1                 | -673.930                 | -3.141                 | 0.178                           | -1.477          | -670.789  |
|                 | 0.5               | -672.280                 | -3.452                 | 0.178                           | -1.166          | -670.554  |
|                 | 0                 | -670.477                 | -3.745                 | 0.178                           | -0.873          | -670.477  |
|                 | -0.5              | -668.529                 | -4.032                 | 0.178                           | -0.586          | -670.545  |
|                 | -1                | -666.425                 | -4.351                 | 0.178                           | -0.267          | -670.776  |
| *COOH           | 1                 | -676.060                 | -3.505                 | 0.177                           | -1.112          | -672.555  |
|                 | 0.5               | -674.234                 | -3.799                 | 0.177                           | -0.818          | -672.334  |
|                 | 0                 | -672.261                 | -4.075                 | 0.177                           | -0.542          | -672.261  |
|                 | -0.5              | -670.154                 | -4.376                 | 0.177                           | -0.241          | -672.342  |
|                 | -1                | -667.874                 | -4.710                 | 0.177                           | 0.093           | -672.584  |
| *HCOO           | 1                 | -677.754                 | -3.519                 | 0.177                           | -1.098          | -674.235  |
|                 | 0.5               | -675.923                 | -3.8043                | 0.177                           | -0.813          | -674.021  |
|                 | 0                 | -673.947                 | -4.0847                | 0.177                           | -0.532          | -673.947  |
|                 | -0.5              | -671.834                 | -4.3896                | 0.177                           | -0.227          | -674.029  |
|                 | -1                | -669.545                 | -4.7227                | 0.177                           | 0.106           | -674.268  |
| *CO             | 1                 | -665.334                 | -3.1848                | 0.177                           | -1.432          | -662.149  |
|                 | 0.5               | -663.667                 | -3.4823                | 0.177                           | -1.135          | -661.926  |
|                 | 0                 | -661.852                 | -3.7658                | 0.177                           | -0.851          | -661.852  |
|                 | -0.5              | -659.894                 | -4.0594                | 0.177                           | -0.558          | -661.924  |
|                 | -1                | -657.774                 | -4.4248                | 0.177                           | -0.192          | -662.199  |
| *HCOOH          | 1                 | -680.968                 | -3.179                 | 0.177                           | -1.439          | -677.789  |
|                 | 0.5               | -679.301                 | -3.484                 | 0.177                           | -1.134          | -677.559  |
|                 | 0                 | -677.483                 | -3.770                 | 0.177                           | -0.847          | -677.483  |
|                 | -0.5              | -675.524                 | -4.059                 | 0.177                           | -0.558          | -677.553  |
|                 | -1                | -673.408                 | -4.381                 | 0.177                           | -0.236          | -677.789  |

**Table S10.** Net Charge,  $E_{\text{DFT}}$ ,  $E_{\text{f}}$ , fermishift, corresponding U and potential-dependent electrochemical energy for Ca-N<sub>2</sub>-DV-1 with different adsorptions.

| Adsorption      | Net Charge<br>(e) | $E_{\text{DFT}}$<br>(eV) | $E_{\text{f}}$<br>(eV) | $E_{\text{fermishift}}$<br>(eV) | U<br>(V vs SHE) | E<br>(eV) |
|-----------------|-------------------|--------------------------|------------------------|---------------------------------|-----------------|-----------|
| None            | 1                 | -649.944                 | -3.050                 | 0.174                           | -1.564          | -646.894  |
|                 | 0.5               | -648.348                 | -3.329                 | 0.174                           | -1.285          | -646.683  |
|                 | 0                 | -646.609                 | -3.610                 | 0.174                           | -1.004          | -646.609  |
|                 | -0.5              | -644.726                 | -3.898                 | 0.174                           | -0.716          | -646.675  |
|                 | -1                | -642.681                 | -4.279                 | 0.174                           | -0.336          | -646.96   |
| CO <sub>2</sub> | 1                 | -673.224                 | -3.035                 | 0.178                           | -1.584          | -670.189  |
|                 | 0.5               | -671.635                 | -3.310                 | 0.178                           | -1.308          | -669.981  |
|                 | 0                 | -669.906                 | -3.593                 | 0.178                           | -1.025          | -669.906  |
|                 | -0.5              | -668.032                 | -3.895                 | 0.178                           | -0.723          | -669.979  |
|                 | -1                | -665.982                 | -4.340                 | 0.178                           | -0.278          | -670.322  |
| *COOH           | 1                 | -675.949                 | -3.437                 | 0.178                           | -1.181          | -672.512  |
|                 | 0.5               | -674.154                 | -3.744                 | 0.178                           | -0.874          | -672.282  |
|                 | 0                 | -672.210                 | -4.031                 | 0.178                           | -0.587          | -672.21   |
|                 | -0.5              | -670.118                 | -4.352                 | 0.178                           | -0.266          | -672.294  |
|                 | -1                | -667.847                 | -4.714                 | 0.178                           | 0.096           | -672.561  |
| *HCOO           | 1                 | -677.723                 | -3.4565                | 0.178                           | -1.162          | -674.266  |
|                 | 0.5               | -675.919                 | -3.7591                | 0.178                           | -0.859          | -674.04   |
|                 | 0                 | -673.968                 | -4.0413                | 0.178                           | -0.577          | -673.968  |
|                 | -0.5              | -671.873                 | -4.3573                | 0.178                           | -0.261          | -674.052  |
|                 | -1                | -669.600                 | -4.7121                | 0.178                           | 0.094           | -674.312  |
| *CO             | 1                 | -664.617                 | -3.0579                | 0.177                           | -1.559          | -661.559  |
|                 | 0.5               | -663.017                 | -3.3349                | 0.177                           | -1.282          | -661.35   |
|                 | 0                 | -661.276                 | -3.6151                | 0.177                           | -1.002          | -661.276  |
|                 | -0.5              | -659.390                 | -3.9034                | 0.177                           | -0.714          | -661.342  |
|                 | -1                | -657.344                 | -4.2832                | 0.177                           | -0.334          | -661.628  |
| *HCOOH          | 1                 | -680.198                 | -3.045                 | 0.178                           | -1.573          | -677.153  |
|                 | 0.5               | -678.605                 | -3.316                 | 0.178                           | -1.302          | -676.947  |
|                 | 0                 | -676.872                 | -3.597                 | 0.178                           | -1.021          | -676.872  |
|                 | -0.5              | -674.998                 | -3.890                 | 0.178                           | -0.728          | -676.943  |
|                 | -1                | -672.950                 | -4.345                 | 0.178                           | -0.273          | -677.295  |

**Table S11.** Net Charge,  $E_{\text{DFT}}$ ,  $E_{\text{f}}$ , fermishift, corresponding U and potential-dependent electrochemical energy for Ca-N<sub>2</sub>-DV-2 with different adsorptions.

| Adsorption      | Net Charge<br>(e) | $E_{\text{DFT}}$<br>(eV) | $E_{\text{f}}$<br>(eV) | $E_{\text{fermishift}}$<br>(eV) | U<br>(V vs SHE) | E<br>(eV) |
|-----------------|-------------------|--------------------------|------------------------|---------------------------------|-----------------|-----------|
| None            | 1                 | -649.488                 | -3.223                 | 0.174                           | -1.391          | -646.265  |
|                 | 0.5               | -647.798                 | -3.514                 | 0.174                           | -1.100          | -646.041  |
|                 | 0                 | -645.942                 | -3.882                 | 0.174                           | -0.732          | -645.942  |
|                 | -0.5              | -643.859                 | -4.380                 | 0.174                           | -0.234          | -646.049  |
|                 | -1                | -641.568                 | -4.779                 | 0.174                           | 0.165           | -646.347  |
| CO <sub>2</sub> | 1                 | -672.717                 | -3.189                 | 0.178                           | -1.429          | -669.528  |
|                 | 0.5               | -671.043                 | -3.486                 | 0.178                           | -1.132          | -669.299  |
|                 | 0                 | -669.200                 | -3.858                 | 0.178                           | -0.761          | -669.2    |
|                 | -0.5              | -667.131                 | -4.355                 | 0.178                           | -0.263          | -669.308  |
|                 | -1                | -664.899                 | -4.665                 | 0.178                           | 0.047           | -669.565  |
| *COOH           | 1                 | -674.819                 | -3.628                 | 0.178                           | -0.991          | -671.191  |
|                 | 0.5               | -672.945                 | -3.881                 | 0.178                           | -0.737          | -671.004  |
|                 | 0                 | -670.925                 | -4.257                 | 0.178                           | -0.361          | -670.925  |
|                 | -0.5              | -668.726                 | -4.535                 | 0.178                           | -0.083          | -670.994  |
|                 | -1                | -666.399                 | -4.773                 | 0.178                           | 0.155           | -671.172  |
| *HCOO           | 1                 | -676.468                 | -3.5073                | 0.178                           | -1.111          | -672.961  |
|                 | 0.5               | -674.641                 | -3.7961                | 0.178                           | -0.822          | -672.743  |
|                 | 0                 | -672.635                 | -4.2563                | 0.178                           | -0.362          | -672.635  |
|                 | -0.5              | -670.392                 | -4.6412                | 0.178                           | 0.023           | -672.712  |
|                 | -1                | -667.996                 | -4.9533                | 0.178                           | 0.335           | -672.949  |
| *CO             | 1                 | -664.428                 | -3.19                  | 0.177                           | -1.427          | -661.238  |
|                 | 0.5               | -662.757                 | -3.4877                | 0.177                           | -1.129          | -661.013  |
|                 | 0                 | -660.895                 | -3.9698                | 0.177                           | -0.647          | -660.895  |
|                 | -0.5              | -658.765                 | -4.4596                | 0.177                           | -0.157          | -660.995  |
|                 | -1                | -656.438                 | -4.8434                | 0.177                           | 0.226           | -661.281  |
| *HCOOH          | 1                 | -679.894                 | -3.288                 | 0.260                           | -1.412          | -676.606  |
|                 | 0.5               | -678.171                 | -3.586                 | 0.260                           | -1.114          | -676.379  |
|                 | 0                 | -676.279                 | -3.958                 | 0.260                           | -0.742          | -676.279  |
|                 | -0.5              | -674.154                 | -4.458                 | 0.260                           | -0.242          | -676.383  |
|                 | -1                | -671.824                 | -4.853                 | 0.260                           | 0.153           | -676.677  |



**Table S12.** Net Charge,  $E_{\text{DFT}}$ ,  $E_{\text{f}}$ , fermishift, corresponding U and potential-dependent electrochemical energy for Ca-N<sub>3</sub>-SV with different adsorptions.

| Adsorption      | Net Charge<br>(e) | $E_{\text{DFT}}$<br>(eV) | $E_{\text{f}}$<br>(eV) | $E_{\text{fermishift}}$<br>(eV) | U<br>(V vs SHE) | E<br>(eV) |
|-----------------|-------------------|--------------------------|------------------------|---------------------------------|-----------------|-----------|
| None            | 1                 | -661.557                 | -2.652                 | 0.176                           | -1.964          | -658.904  |
|                 | 0.5               | -660.161                 | -2.929                 | 0.176                           | -1.687          | -658.696  |
|                 | 0                 | -658.616                 | -3.220                 | 0.176                           | -1.396          | -658.616  |
|                 | -0.5              | -656.911                 | -3.549                 | 0.176                           | -1.068          | -658.686  |
|                 | -1                | -654.982                 | -4.334                 | 0.176                           | -0.282          | -659.317  |
| CO <sub>2</sub> | 1                 | -684.157                 | -3.175                 | 0.180                           | -1.445          | -680.982  |
|                 | 0.5               | -682.475                 | -3.499                 | 0.180                           | -1.121          | -680.725  |
|                 | 0                 | -680.613                 | -3.869                 | 0.180                           | -0.751          | -680.613  |
|                 | -0.5              | -678.522                 | -4.439                 | 0.180                           | -0.181          | -680.742  |
|                 | -1                | -676.234                 | -4.730                 | 0.180                           | 0.110           | -680.964  |
| *COOH           | 1                 | -687.639                 | -3.157                 | 0.180                           | -1.463          | -684.482  |
|                 | 0.5               | -685.965                 | -3.487                 | 0.180                           | -1.133          | -684.222  |
|                 | 0                 | -684.070                 | -4.241                 | 0.180                           | -0.379          | -684.07   |
|                 | -0.5              | -681.878                 | -4.569                 | 0.180                           | -0.051          | -684.162  |
|                 | -1                | -679.536                 | -4.819                 | 0.180                           | 0.199           | -684.355  |
| *HCOO           | 1                 | -689.336                 | -3.1383                | 0.180                           | -1.482          | -686.198  |
|                 | 0.5               | -687.672                 | -3.4691                | 0.180                           | -1.151          | -685.937  |
|                 | 0                 | -685.780                 | -4.272                 | 0.180                           | -0.348          | -685.78   |
|                 | -0.5              | -683.504                 | -4.7957                | 0.180                           | 0.176           | -685.901  |
|                 | -1                | -681.037                 | -5.0947                | 0.180                           | 0.475           | -686.132  |
| *CO             | 1                 | -676.263                 | -2.6458                | 0.179                           | -1.973          | -673.617  |
|                 | 0.5               | -674.874                 | -2.9186                | 0.179                           | -1.700          | -673.415  |
|                 | 0                 | -673.334                 | -3.2091                | 0.179                           | -1.410          | -673.334  |
|                 | -0.5              | -671.635                 | -3.5379                | 0.179                           | -1.081          | -673.404  |
|                 | -1                | -669.711                 | -4.3318                | 0.179                           | -0.287          | -674.042  |
| *HCOOH          | 1                 | -691.724                 | -2.6513                | 0.179                           | -1.968          | -689.073  |
|                 | 0.5               | -690.328                 | -2.9296                | 0.179                           | -1.689          | -688.864  |
|                 | 0                 | -688.783                 | -3.2212                | 0.179                           | -1.398          | -688.783  |
|                 | -0.5              | -687.078                 | -3.5507                | 0.179                           | -1.068          | -688.853  |
|                 | -1                | -685.147                 | -4.3419                | 0.179                           | -0.277          | -689.489  |

**Table S13.** Net Charge,  $E_{\text{DFT}}$ ,  $E_{\text{f}}$ , fermishift, corresponding U and potential-dependent electrochemical energy for Ca-GY with different adsorptions.

| Adsorption      | Net Charge<br>(e) | $E_{\text{DFT}}$<br>(eV) | $E_{\text{f}}$<br>(eV) | $E_{\text{fermishift}}$<br>(eV) | U<br>(V vs SHE) | E<br>(eV) |
|-----------------|-------------------|--------------------------|------------------------|---------------------------------|-----------------|-----------|
| None            | 1                 | -423.581                 | -3.5493                | 0.137                           | -1.028          | -420.031  |
|                 | 0.5               | -421.747                 | -3.7872                | 0.137                           | -0.790          | -419.853  |
|                 | 0                 | -419.791                 | -4.0281                | 0.137                           | -0.549          | -419.791  |
|                 | -0.5              | -417.712                 | -4.2828                | 0.137                           | -0.294          | -419.854  |
|                 | -1                | -415.503                 | -4.5473                | 0.137                           | -0.030          | -420.051  |
| CO <sub>2</sub> | 1                 | -445.5                   | -3.8991                | 0.141                           | -0.682          | -441.601  |
|                 | 0.5               | -443.484                 | -4.1568                | 0.141                           | -0.424          | -441.406  |
|                 | 0                 | -441.337                 | -4.4257                | 0.141                           | -0.155          | -441.337  |
|                 | -0.5              | -439.055                 | -4.68                  | 0.141                           | 0.099           | -441.395  |
|                 | -1                | -436.653                 | -4.9128                | 0.141                           | 0.332           | -441.566  |
| *COOH           | 1                 | -449.209                 | -3.8587                | 0.141                           | -0.722          | -445.35   |
|                 | 0.5               | -447.212                 | -4.1179                | 0.141                           | -0.463          | -445.153  |
|                 | 0                 | -445.083                 | -4.3895                | 0.141                           | -0.192          | -445.083  |
|                 | -0.5              | -442.813                 | -4.6773                | 0.141                           | 0.096           | -445.151  |
|                 | -1                | -440.392                 | -4.9737                | 0.141                           | 0.393           | -445.366  |
| *HCOO           | 1                 | -450.803                 | -3.8839                | 0.141                           | -0.697          | -446.919  |
|                 | 0.5               | -448.794                 | -4.1425                | 0.141                           | -0.439          | -446.723  |
|                 | 0                 | -446.653                 | -4.4133                | 0.141                           | -0.168          | -446.653  |
|                 | -0.5              | -444.37                  | -4.7016                | 0.141                           | 0.121           | -446.721  |
|                 | -1                | -441.93                  | -5.4271                | 0.141                           | 0.846           | -447.357  |
| *CO             | 1                 | -438.227                 | -3.5272                | 0.140                           | -1.053          | -434.7    |
|                 | 0.5               | -436.405                 | -3.7629                | 0.140                           | -0.817          | -434.524  |
|                 | 0                 | -434.461                 | -4.0059                | 0.140                           | -0.574          | -434.461  |
|                 | -0.5              | -432.393                 | -4.2623                | 0.140                           | -0.318          | -434.524  |
|                 | -1                | -430.194                 | -4.5283                | 0.140                           | -0.052          | -434.722  |
| *HCOOH          | 1                 | -453.603                 | -3.5173                | 0.141                           | -1.064          | -450.086  |
|                 | 0.5               | -451.786                 | -3.7526                | 0.141                           | -0.828          | -449.909  |
|                 | 0                 | -449.847                 | -3.9949                | 0.141                           | -0.586          | -449.847  |
|                 | -0.5              | -447.784                 | -4.2509                | 0.141                           | -0.330          | -449.909  |
|                 | -1                | -445.591                 | -4.5169                | 0.141                           | -0.064          | -450.108  |

**Table S14.** Net Charge,  $E_{\text{DFT}}$ ,  $E_{\text{f}}$ , fermishift, corresponding U and potential-dependent electrochemical energy for Mg-N<sub>4</sub>-DV with different adsorptions.

| Adsorption      | Net Charge<br>(e) | $E_{\text{DFT}}$<br>(eV) | $E_{\text{f}}$<br>(eV) | $E_{\text{fermishift}}$<br>(eV) | U<br>(V vs SHE) | E<br>(eV) |
|-----------------|-------------------|--------------------------|------------------------|---------------------------------|-----------------|-----------|
| None            | 1                 | -676.711                 | -3.820                 | 0.250                           | -1.653          | -647.531  |
|                 | 0.5               | -674.719                 | -4.137                 | 0.250                           | -1.283          | -647.245  |
|                 | 0                 | -672.584                 | -4.390                 | 0.250                           | -0.816          | -647.111  |
|                 | -0.5              | -670.329                 | -4.659                 | 0.250                           | -0.506          | -647.186  |
|                 | -1                | -667.918                 | -4.940                 | 0.250                           | -0.259          | -647.368  |
| CO <sub>2</sub> | 1                 | -674.069                 | -3.063                 | 0.260                           | -1.637          | -671.005  |
|                 | 0.5               | -672.436                 | -3.433                 | 0.260                           | -1.267          | -670.719  |
|                 | 0                 | -670.578                 | -3.955                 | 0.260                           | -0.745          | -670.578  |
|                 | -0.5              | -668.521                 | -4.275                 | 0.260                           | -0.425          | -670.658  |
|                 | -1                | -666.322                 | -4.518                 | 0.260                           | -0.182          | -670.84   |
| *COOH           | 1                 | -676.711                 | -3.820                 | 0.260                           | -0.880          | -672.892  |
|                 | 0.5               | -674.719                 | -4.137                 | 0.260                           | -0.563          | -672.651  |
|                 | 0                 | -672.584                 | -4.390                 | 0.260                           | -0.310          | -672.584  |
|                 | -0.5              | -670.329                 | -4.659                 | 0.260                           | -0.041          | -672.658  |
|                 | -1                | -667.918                 | -4.940                 | 0.260                           | 0.240           | -672.858  |
| *HCOO           | 1                 | -678.148                 | -3.7489                | 0.260                           | -0.951          | -674.399  |
|                 | 0.5               | -676.189                 | -4.0681                | 0.260                           | -0.632          | -674.155  |
|                 | 0                 | -674.085                 | -4.3305                | 0.260                           | -0.370          | -674.085  |
|                 | -0.5              | -671.858                 | -4.6089                | 0.260                           | -0.091          | -674.162  |
|                 | -1                | -669.469                 | -4.903                 | 0.260                           | 0.203           | -674.372  |
| *CO             | 1                 | -665.184                 | -3.1082                | 0.260                           | -1.592          | -662.076  |
|                 | 0.5               | -663.530                 | -3.4766                | 0.260                           | -1.223          | -661.792  |
|                 | 0                 | -661.653                 | -3.9798                | 0.260                           | -0.720          | -661.653  |
|                 | -0.5              | -659.584                 | -4.2964                | 0.260                           | -0.404          | -661.732  |
|                 | -1                | -657.373                 | -4.5422                | 0.260                           | -0.158          | -661.916  |
| *HCOOH          | 1                 | -681.041                 | -3.073                 | 0.260                           | -1.627          | -677.968  |
|                 | 0.5               | -679.403                 | -3.449                 | 0.260                           | -1.251          | -677.678  |
|                 | 0                 | -677.534                 | -3.982                 | 0.260                           | -0.718          | -677.534  |
|                 | -0.5              | -675.464                 | -4.303                 | 0.260                           | -0.397          | -677.616  |
|                 | -1                | -673.257                 | -4.530                 | 0.260                           | -0.170          | -677.787  |

**Table S15.** Net Charge,  $E_{\text{DFT}}$ ,  $E_{\text{f}}$ , fermishift, corresponding U and potential-dependent electrochemical energy for Mg-N<sub>3</sub>-DV with different adsorptions.

| Adsorption      | Net Charge<br>(e) | $E_{\text{DFT}}$<br>(eV) | $E_{\text{f}}$<br>(eV) | $E_{\text{fermishift}}$<br>(eV) | U<br>(V vs SHE) | E<br>(eV) |
|-----------------|-------------------|--------------------------|------------------------|---------------------------------|-----------------|-----------|
| None            | 1                 | -649.268                 | -3.355                 | 0.250                           | -1.335          | -645.913  |
|                 | 0.5               | -647.517                 | -3.650                 | 0.250                           | -1.041          | -645.692  |
|                 | 0                 | -645.621                 | -3.926                 | 0.250                           | -0.764          | -645.621  |
|                 | -0.5              | -643.586                 | -4.218                 | 0.250                           | -0.473          | -645.694  |
|                 | -1                | -641.389                 | -4.574                 | 0.250                           | -0.116          | -645.963  |
| CO <sub>2</sub> | 1                 | -673.142                 | -3.380                 | 0.260                           | -1.320          | -669.762  |
|                 | 0.5               | -671.372                 | -3.692                 | 0.260                           | -1.008          | -669.526  |
|                 | 0                 | -669.451                 | -3.974                 | 0.260                           | -0.726          | -669.451  |
|                 | -0.5              | -667.392                 | -4.271                 | 0.260                           | -0.429          | -669.527  |
|                 | -1                | -665.169                 | -4.608                 | 0.260                           | -0.092          | -669.777  |
| *COOH           | 1                 | -675.438                 | -3.8572                | 0.260                           | -0.843          | -671.581  |
|                 | 0.5               | -673.436                 | -4.1447                | 0.260                           | -0.555          | -671.364  |
|                 | 0                 | -671.278                 | -4.4789                | 0.260                           | -0.221          | -671.278  |
|                 | -0.5              | -668.836                 | -5.0898                | 0.260                           | 0.390           | -671.381  |
|                 | -1                | -666.200                 | -5.4293                | 0.260                           | 0.729           | -671.63   |
| *HCOO           | 1                 | -677.030                 | -3.7874                | 0.260                           | -0.913          | -673.242  |
|                 | 0.5               | -675.058                 | -4.0878                | 0.260                           | -0.612          | -673.014  |
|                 | 0                 | -672.919                 | -4.4843                | 0.260                           | -0.216          | -672.919  |
|                 | -0.5              | -670.448                 | -5.1815                | 0.260                           | 0.481           | -673.038  |
|                 | -1                | -667.770                 | -5.5218                | 0.260                           | 0.822           | -673.292  |
| *CO             | 1                 | -664.370                 | -3.5119                | 0.260                           | -1.188          | -660.858  |
|                 | 0.5               | -662.537                 | -3.8147                | 0.260                           | -0.885          | -660.63   |
|                 | 0                 | -660.561                 | -4.0795                | 0.260                           | -0.621          | -660.561  |
|                 | -0.5              | -658.467                 | -4.3440                | 0.260                           | -0.356          | -660.639  |
|                 | -1                | -656.211                 | -4.6824                | 0.260                           | -0.018          | -660.894  |
| *HCOOH          | 1                 | -679.625                 | -3.394                 | 0.260                           | -1.306          | -676.232  |
|                 | 0.5               | -677.852                 | -3.692                 | 0.260                           | -1.008          | -676.006  |
|                 | 0                 | -675.932                 | -3.975                 | 0.260                           | -0.725          | -675.932  |
|                 | -0.5              | -673.870                 | -4.278                 | 0.260                           | -0.422          | -676.009  |
|                 | -1                | -671.636                 | -4.664                 | 0.260                           | -0.036          | -676.301  |

**Table S16.** Net Charge,  $E_{\text{DFT}}$ ,  $E_{\text{f}}$ , fermishift, corresponding U and potential-dependent electrochemical energy for Mg-N<sub>3</sub>-SV with different adsorptions.

| Adsorption      | Net Charge<br>(e) | $E_{\text{DFT}}$<br>(eV) | $E_{\text{f}}$<br>(eV) | $E_{\text{fermishift}}$<br>(eV) | U<br>(V vs SHE) | E<br>(eV) |
|-----------------|-------------------|--------------------------|------------------------|---------------------------------|-----------------|-----------|
| None            | 1                 | -661.203                 | -2.757                 | 0.255                           | -1.938          | -658.446  |
|                 | 0.5               | -659.755                 | -3.033                 | 0.255                           | -1.663          | -658.239  |
|                 | 0                 | -658.159                 | -3.323                 | 0.255                           | -1.372          | -658.159  |
|                 | -0.5              | -656.403                 | -3.651                 | 0.255                           | -1.044          | -658.228  |
|                 | -1                | -654.425                 | -4.423                 | 0.255                           | -0.272          | -658.848  |
| CO <sub>2</sub> | 1                 | -682.848                 | -3.386                 | 0.265                           | -1.319          | -679.462  |
|                 | 0.5               | -681.082                 | -3.665                 | 0.265                           | -1.040          | -679.25   |
|                 | 0                 | -679.095                 | -4.453                 | 0.265                           | -0.252          | -679.095  |
|                 | -0.5              | -676.717                 | -4.988                 | 0.265                           | 0.283           | -679.211  |
|                 | -1                | -674.160                 | -5.248                 | 0.265                           | 0.543           | -679.409  |
| *COOH           | 1                 | -686.677                 | -3.278                 | 0.265                           | -1.427          | -683.4    |
|                 | 0.5               | -684.944                 | -3.608                 | 0.265                           | -1.097          | -683.14   |
|                 | 0                 | -682.984                 | -4.399                 | 0.265                           | -0.306          | -682.984  |
|                 | -0.5              | -680.689                 | -4.752                 | 0.265                           | 0.047           | -683.065  |
|                 | -1                | -678.255                 | -4.993                 | 0.265                           | 0.288           | -683.249  |
| *HCOO           | 1                 | -688.224                 | -3.2919                | 0.265                           | -1.413          | -684.932  |
|                 | 0.5               | -686.483                 | -3.6246                | 0.265                           | -1.080          | -684.671  |
|                 | 0                 | -684.514                 | -4.4167                | 0.265                           | -0.288          | -684.514  |
|                 | -0.5              | -682.157                 | -4.9694                | 0.265                           | 0.264           | -684.642  |
|                 | -1                | -679.602                 | -5.278                 | 0.265                           | 0.573           | -684.88   |
| *CO             | 1                 | -675.492                 | -3.1378                | 0.262                           | -1.965          | -672.316  |
|                 | 0.5               | -673.850                 | -3.4343                | 0.262                           | -1.686          | -672.106  |
|                 | 0                 | -672.047                 | -3.7439                | 0.262                           | -1.394          | -672.025  |
|                 | -0.5              | -670.076                 | -4.0902                | 0.262                           | -1.065          | -672.095  |
|                 | -1                | -667.874                 | -4.8794                | 0.262                           | -0.283          | -672.723  |
| *HCOOH          | 1                 | -690.509                 | -2.781                 | 0.265                           | -1.924          | -687.728  |
|                 | 0.5               | -689.049                 | -3.057                 | 0.265                           | -1.649          | -687.521  |
|                 | 0                 | -687.441                 | -3.345                 | 0.265                           | -1.360          | -687.441  |
|                 | -0.5              | -685.675                 | -3.672                 | 0.265                           | -1.033          | -687.511  |
|                 | -1                | -683.687                 | -4.450                 | 0.265                           | -0.256          | -688.136  |

## Reference

1. Richard Dronskowski, Peter E. Bloechl. Crystal orbital Hamilton populations (COHP): energy-resolved visualization of chemical bonding in solids based on density-functional calculations. *J. Phys. Chem.* **1993**, 97(33), 8617–8624. DOI:10.1021/j100135a014
2. Nelson R, Ertural C, George J, Deringer VL, Hautier G, Dronskowski R. LOBSTER: Local orbital projections, atomic charges, and chemical-bonding analysis from projector-augmented-wave-based density-functional theory. *J Comput Chem.* **2020**, 41(21), 1931-1940. DOI:10.1002/jcc.26353
3. Yan Jiao, Yao Zheng, Ping Chen, Mietek Jaroniec, Shi-Zhang Qiao. Molecular Scaffolding Strategy with Synergistic Active Centers To Facilitate Electrocatalytic CO<sub>2</sub> Reduction to Hydrocarbon/Alcohol. *J. Am. Chem. Soc.* **2017**, 139(49), 18093–18100. DOI:10.1021/jacs.7b10817
